# Supplementary material for: Failure of Micractinium simplicissimum Phosphate Resilience upon Abrupt Re-Feeding of Its Phosphorus-Starved Cultures
Source: MDPI journal article supplement (doi:10.3390/ijms24108484), 2023-05-09
Supplement: s1 [file s1]

**Table S1.** The JIP-test parameters used for monitoring of the microalgal cultures in the present work (according to [54,55]).

| Parameter                                                                                                                       | Description                                                                                                                                                                                                          |
|---------------------------------------------------------------------------------------------------------------------------------|----------------------------------------------------------------------------------------------------------------------------------------------------------------------------------------------------------------------|
| $F_O, F_J, F_{300}, F_m$                                                                                                        | Fluorescence yield at the points O (minimal fluorescence, when all PS II reaction centers, RC are open), J (2 ms), at 300 $\mu$ s (K-step), and at the point of the maximum of OJIP, M, when all PS II RC are closed |
| PS II $Q_y = \varphi_{P_0} = \frac{F_m - F_O}{F_m} = \frac{F_V}{F_m}$                                                           | Maximum potential quantum yield of primary photochemistry in photosystem II                                                                                                                                          |
| $NPQ = \frac{F_m}{F_m'} - 1$                                                                                                    | A non-photochemical quenching parameter according to Stern-Volmer                                                                                                                                                    |
| $\psi_0 = 1 - \frac{F_J - F_O}{F_M - F_O}$                                                                                      | The probability of electron transfer from PS II to PQ pool                                                                                                                                                           |
| $M_0 = 4 \frac{F_{300} - F_O}{F_M - F_O}$                                                                                       | An approximation of the initial slope of OJIP attributed to QA reduction                                                                                                                                             |
| $\phi_{D_0} = \frac{F_O}{F_M}$                                                                                                  | Quantum yield of energy dissipation                                                                                                                                                                                  |
| $\phi_{E_0} = \psi_0 \left( 1 - \frac{F_O}{F_M} \right)$                                                                        | Quantum yield of electron transport                                                                                                                                                                                  |
| $ABS/RC = M_0 \cdot \frac{1}{V_J} \cdot \frac{1}{\varphi_{P_0}}$                                                                | Absorbed energy flux per RC                                                                                                                                                                                          |
| $TR_0/RC = M_0 \cdot \frac{1}{V_J}$                                                                                             | Trapped energy flux per RC                                                                                                                                                                                           |
| $DI_0/RC = ABS/RC - TR_0/RC$                                                                                                    | Thermally dissipated energy flux per RC                                                                                                                                                                              |
| $PI_{ABS} = ABS/RC \cdot \left( \frac{\varphi_{P_0}}{1 - \varphi_{P_0}} \right) \cdot \left( \frac{\psi_0}{1 - \psi_0} \right)$ | Performance index expressed on the light absorption basis                                                                                                                                                            |

**Table S2.** Elemental composition and localization the inclusions in the ruptured cells *Micractinium simplicissimum* IPPAS C-2056 (for explanation, see text)

| Medium type<br>or time after P <sub>i</sub><br>re-feeding | Cell wall                                                     | Cytosol               | Vacuole                           |                   | Chloroplast<br>stroma | Nucleus |
|-----------------------------------------------------------|---------------------------------------------------------------|-----------------------|-----------------------------------|-------------------|-----------------------|---------|
|                                                           |                                                               |                       | Small<br>spherules                | Large<br>globules |                       |         |
| BG-11 <sub>K</sub>                                        | ND                                                            | ND                    | ND                                | ND                | ND                    | ND      |
| P-free medium                                             | ND                                                            | ND                    | ND                                | ND                | ND                    | ND      |
| 4 h*                                                      | ND                                                            | ND                    | ND                                | ND                | ND                    | ND      |
| 24 h                                                      | **Fe,<br>Fe-P,<br>Fe-P-S,<br>P-Ca-Mg,<br>P-Ca,<br>P-Mg,<br>P† | P-Na-Mg-Ca,<br>P-N-Mg | P-Mg-Ca†<br>P-N-S-Ca-Mg<br>P-N-Mg | P-N-Mg,<br>P-N-Ca | P-S†,<br>P-Mg-Ca      | P†      |
| 72 h                                                      | Fe,<br>P,<br>S,<br>P-Fe-Na-Ca                                 | ND                    | ND                                | ND                | ND                    | ND      |
| 168–240 h                                                 | P                                                             | P-N-Mg,<br>P-N,<br>P  | P-Na-Mg,<br>P-Na-Mg-Ca            | ND                | P-N                   | ND      |

\*Time after re-feeding of the P-starved cultures with P<sub>i</sub>.

\*\*Elements are ordered according to an increase in the magnitude of the corresponding element peak in the EDX spectrum.

†The EDX spectrum possessed the peak of uranium (U).

ND—no data.
